# Supplementary material for: Plant Growth Promotion Function of Bacillus sp. Strains Isolated from Salt-Pan Rhizosphere and Their Biocontrol Potential against Macrophomina phaseolina
Source: PubMed Central journal article supplement (PMC8036593; doi:10.3390/ijms22073324), 2021-03-24
Supplement: ijms-22-03324-s001.pdf [file ijms-22-03324-s001.pdf]

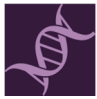

## Supplementary Material

**Table S1.** Preliminary characterization of spore-forming bacteria isolated from the rhizosphere of *J. sabina* plants.

| Isolate Code | Colony Color | Colony Morphology | *Anaerobic Growth | pH Range | Temperature Range (°C) |
|--------------|--------------|-------------------|-------------------|----------|------------------------|
| RHFS01       | Creamy-white | Rhizoid           | ++                | 4–12     | 15–50                  |
| RHFS02       | Creamy-white | Irregular         | ++                | 4–12     | 25–50                  |
| RHFS03       | Creamy-white | Rhizoid           | +++               | 4–12     | 15–60                  |
| RHFS04       | Creamy-white | Punctiform        | +++               | 4–12     | 15–60                  |
| RHFS05       | Creamy-white | Lobate            | +                 | 4–12     | 15–50                  |
| RHFS06       | Creamy-white | Irregular         | +++               | 6–12     | 15–60                  |
| RHFS07       | Brown        | Circular          | +++               | 4–12     | 15–60                  |
| RHFS08       | Creamy-white | Filamentous       | +                 | 4–12     | 15–50                  |
| RHFS09       | Creamy-white | Irregular         | +++               | 2–12     | 15–50                  |
| RHFS10       | White        | Undulate          | ++                | 6–12     | 15–50                  |
| RHFS11       | Creamy-white | Irregular         | +++               | 4–12     | 15–60                  |
| RHFS12       | Creamy-white | Circular          | +++               | 4–12     | 15–60                  |
| RHFS13       | Creamy-white | Circular          | +++               | 2–12     | 15–60                  |
| RHFS14       | Creamy-white | Circular          | +                 | 4–12     | 15–50                  |
| RHFS15       | Creamy-white | Irregular         | +++               | 4–12     | 15–60                  |
| RHFS16       | Orange       | Irregular         | ++                | 4–12     | 15–60                  |
| RHFS17       | Translucent  | Lobate            | +++               | 4–12     | 15–50                  |
| RHFS18       | Milky white  | Filamentous       | ++                | 4–12     | 15–60                  |
| RHFS19       | Milky white  | Irregular         | +++               | 4–12     | 15–60                  |
| RHFS20       | Creamy-white | Undulate          | ++                | 4–12     | 15–40                  |
| RHFS22       | Yellow       | Translucent       | +++               | 4–12     | 15–40                  |
| RHFS28       | Creamy-white | Circular          | ++                | 4–12     | 15–40                  |

\*Anaerobic growth: +:low growth; ++:moderately growth; +++:high growth.

**Table S2.** 16S rRNA gene-based molecular identity of isolated spore-forming bacteria, their accession numbers, and strain identification is reported.

| Bacteria ID | Accession number | Nearest neighbor from NCBI with Accession number                             | Sequence similarity (%) |
|-------------|------------------|------------------------------------------------------------------------------|-------------------------|
| RHFS1       | MW678576         | <i>Bacillus licheniformis</i> strain QT-98 (MT065812.1)                      | 98.96                   |
| RHFS2       | MW678577         | <i>Bacillus mojavensis</i> strain YZJP308 (MN931392.1)                       | 100.00                  |
| RHFS3       | MW678578         | <i>Bacillus paralicheniformis</i> strain B34-013 (MK063845.1)                | 100.00                  |
| RHFS4       | MW678579         | <i>Bacillus subtilis</i> subsp. <i>inaquosorum</i> strain ZYR10 (MN931257.1) | 100.00                  |
| RHFS5       | MW677571         | <i>Bacillus velezensis</i> strain EMP09 (MN062933.1)                         | 100.00                  |
| RHFS6       | MW677572         | <i>Bacillus halotolerans</i> strain FUM1 (MK093005.1)                        | 100.00                  |
| RHFS7       | MW678580         | <i>Bacillus flexus</i> strain S6c (MT645459.1)                               | 99.65                   |
| RHFS8       | MW678581         | <i>Bacillus licheniformis</i> SV12 (LC422787.1)                              | 99.89                   |
| RHFS9       | MW677573         | <i>Bacillus velezensis</i> strain XC1 (MT649755.1)                           | 99.85                   |
| RHFS10      | MW678582         | <i>Bacillus vallismortis</i> strain CBs8 (MK290421.1)                        | 100.00                  |
| RHFS11      | MW678583         | <i>Bacillus velezensis</i> strain GST21(MN809529.1)                          | 100.00                  |
| RHFS12      | MW678584         | <i>Bacillus subtilis</i> strain HR02 (MK283755.1)                            | 100.00                  |
| RHFS13      | MW678585         | <i>Bacillus tequilensis</i> strain R-QL-48-26(MT078639.1)                    | 100.00                  |
| RHFS14      | MW678586         | <i>Bacillus subtilis</i> strain R47 (MH359177.1)                             | 90.19                   |
| RHFS15      | MW678587         | <i>Bacillus velezensis</i> strain 1601 (MW242869.1)                          | 100.00                  |
| RHFS16      | MW678588         | <i>Bacillus toyonensis</i> strain IBB-TEB3(MT573517.1)                       | 100.00                  |
| RHFS17      | MW678589         | <i>Bacillus amyloliquefaciens</i> strain NO10 (MT377854.1)                   | 100.00                  |
| RHFS18      | MW678590         | <i>Bacillus amyloliquefaciens</i> strain S8TS (MK729078.1)                   | 100.00                  |
| RHFS19      | MW677570         | <i>Bacillus paralicheniformis</i> strain AJVR1(MT459810.1)                   | 100.00                  |
| RHFS20      | MW678591         | <i>Bacillus proteoliticus</i> strain 1372 (MT573794.1)                       | 100.00                  |
| RHFS22      | MW678592         | <i>Bacillus tequilensis</i> strain CFR01 (MT641220.1)                        | 100.00                  |
| RHFS28      | MW678593         | <i>Bacillus cereus</i> strain F3-1-38 (KX350019.1)                           | 100.00                  |

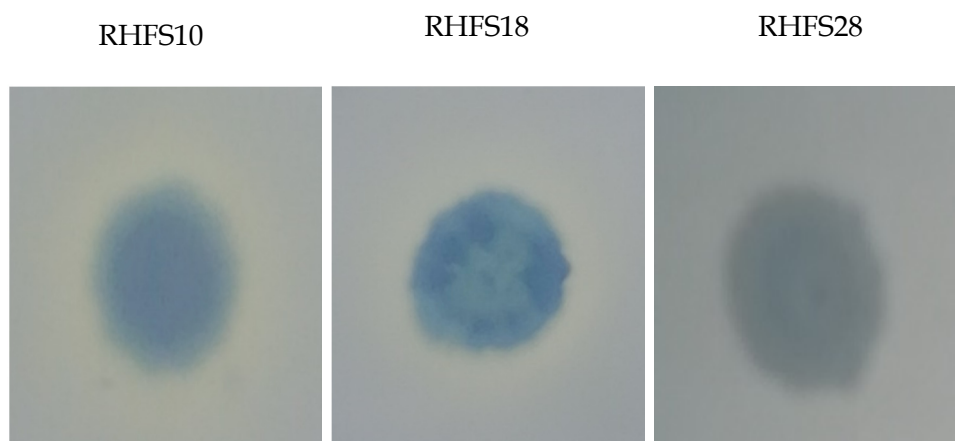

**Figure S1.** Potential plant growth-promoting traits of selected bacterial isolates. The ability to solubilize inorganic phosphate was assessed by growing the bacterial isolates on the Pikovskaya agar assay [30]. The experiment was performed in triplicate with three independent trials.

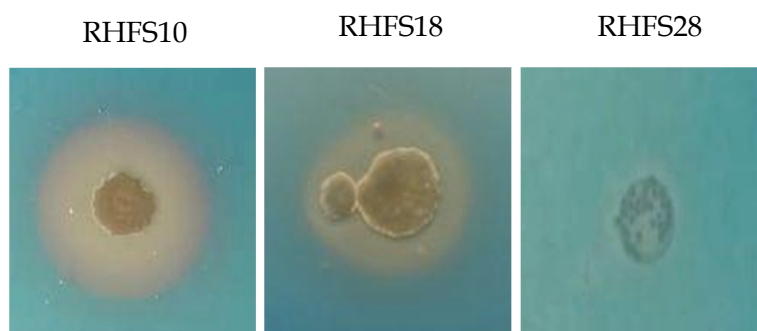

**Figure S2.** Potential plant growth-promoting traits of selected bacterial isolates. Siderophore production was assessed through O-CAS assay method [31]. The experiment was performed in triplicate with three independent trials.

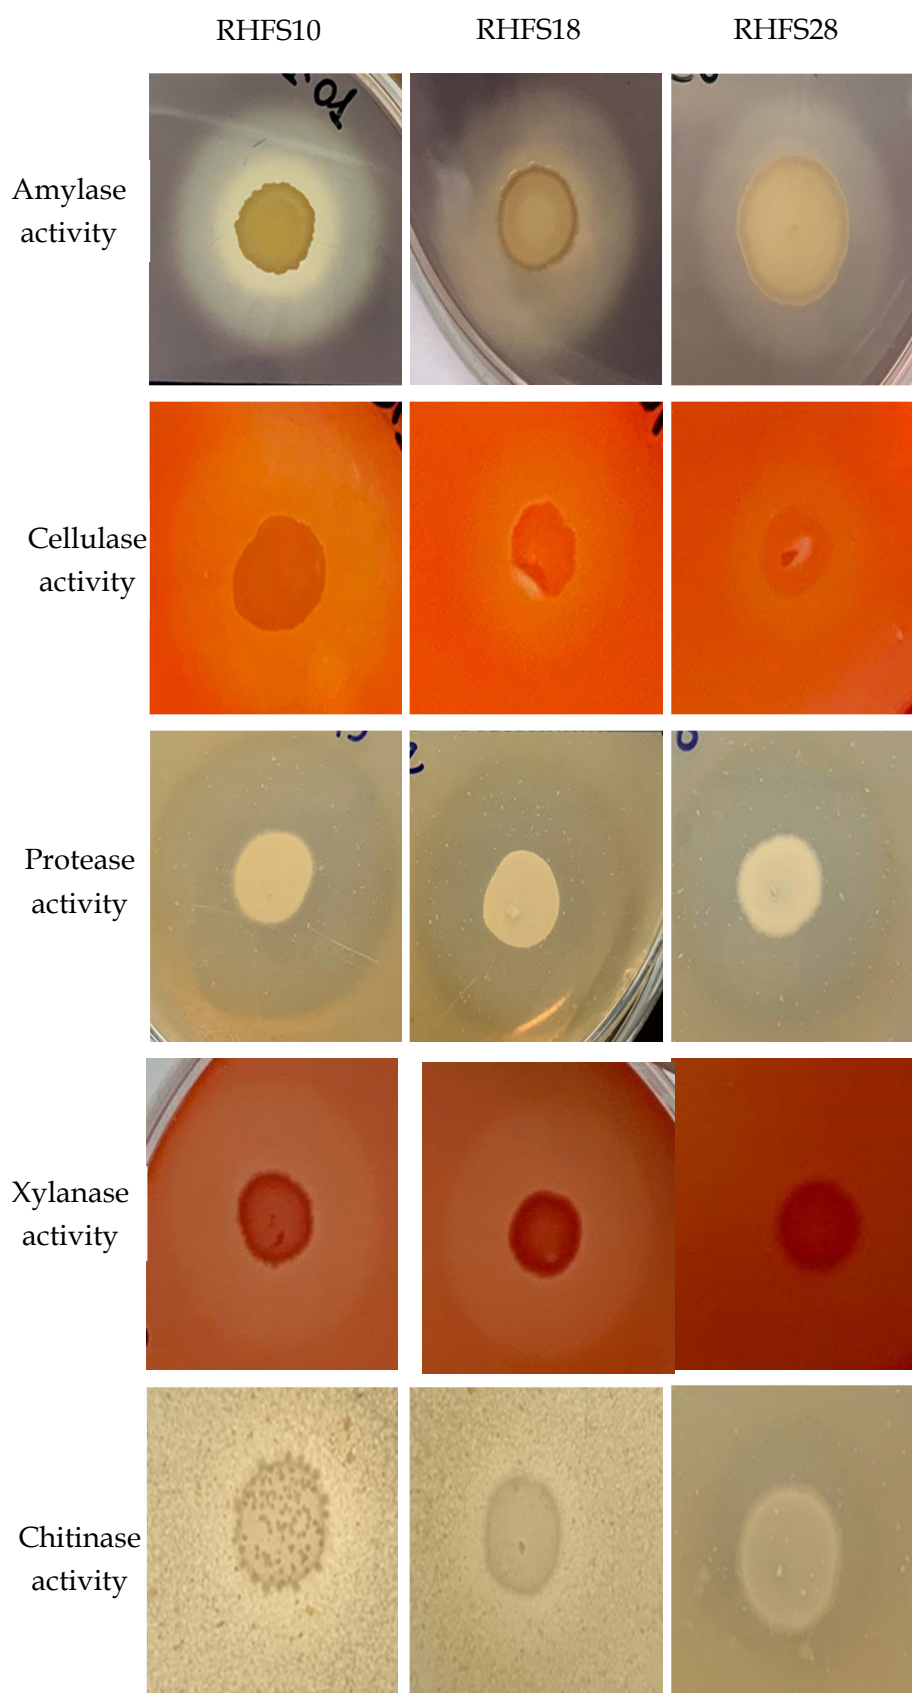

**Figure S3.** Hydrolytic activities of selected bacterial isolates [33–39]. The experiment was performed in triplicate with three independent trials.

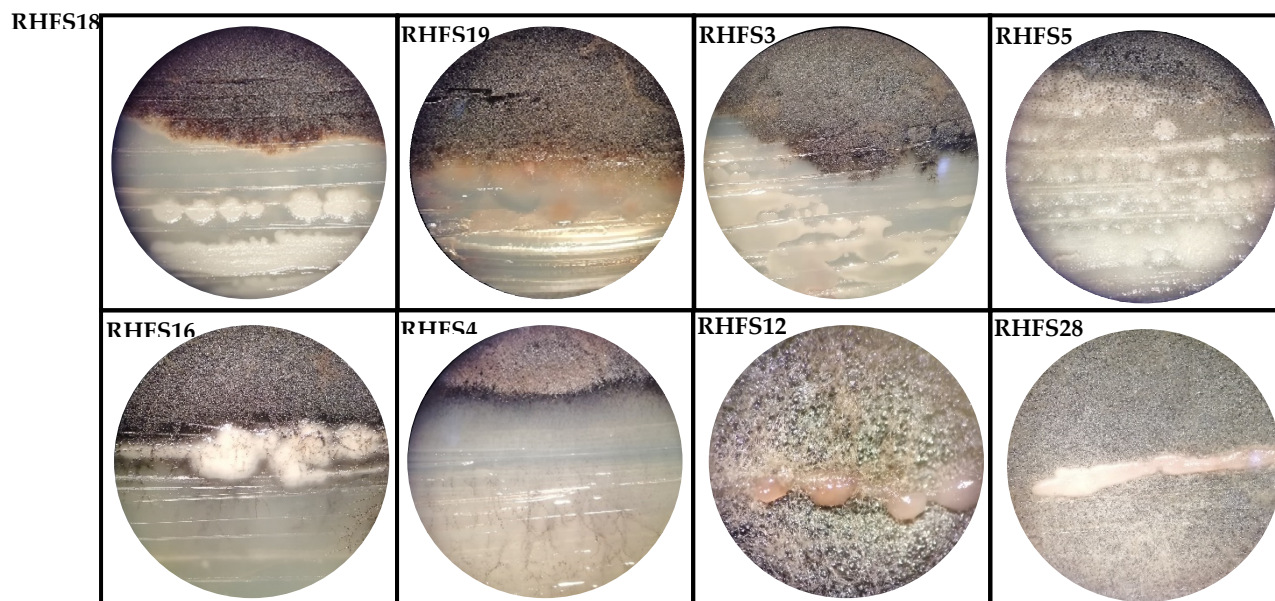

**Figure S4.** Preliminary dual-culture assay. The figure shows other examples of spore-forming bacteria isolated from the rhizosphere of *J.sabina* plants tested against *M. phaseolina* with antifungal activity (RHFS18, RHFS19, RHFS3, RHFS5, RHFS16, and RHFS4) and examples of bacteria not able to inhibit the fungal growth (RHFS12 and RHFS28). All plates were observed under a stereoscopic microscope (10× magnification) [40].
